# Supplementary material for: Evaluation of the Fruit Quality and Phytochemical Compounds in Peach and Nectarine Cultivars
Source: MDPI journal article supplement (doi:10.3390/plants12081618), 2023-04-12
Supplement: s1 [file s1]

**Table S4.** Sugar content (g kg<sup>-1</sup> FW) in fruits of yellow and white nectarine cultivars

| Yellow-flesh cvs    | Sucrose    | Glucose    | Fructose   | Sorbitol  | Total sugars |
|---------------------|------------|------------|------------|-----------|--------------|
| Alitop              | 85.44±0.22 | 10.11±0.09 | 11.23±0.14 | 1.12±0.04 | 107.82±0.39  |
| Alma                | 72.21±0.13 | 17.04±0.10 | 11.37±0.79 | 1.39±0.07 | 92.02±1.39   |
| Amiga               | 66.44±0.19 | 9.44±0.10  | 10.50±0.22 | 3.32±0.11 | 89.70±0.15   |
| Antares             | 76.67±0.14 | 9.20±0.35  | 10.95±0.10 | 3.29±0.05 | 100.11±0.33  |
| August Red          | 84.89±0.10 | 8.15±0.06  | 10.19±0.14 | 3.24±0.08 | 106.48±0.17  |
| Big Top             | 87.38±0.16 | 11.24±0.06 | 13.37±0.11 | 3.30±0.14 | 81.97±1.04   |
| Claudia             | 57.92±0.11 | 6.32±0.10  | 8.61±0.16  | 2.60±0.06 | 75.45±0.36   |
| Diamond Princess    | 65.01±0.30 | 7.52±0.14  | 7.94±0.10  | 2.06±0.09 | 82.53±0.28   |
| Diamond Ray         | 76.06±0.16 | 8.90±0.11  | 9.02±0.09  | 2.29±0.04 | 96.27±0.10   |
| Fire Top            | 79.06±0.42 | 11.66±0.11 | 12.25±0.11 | 4.44±0.11 | 107.41±0.50  |
| Gianna Laura Dolce  | 52.28±0.17 | 7.76±0.14  | 8.54±0.10  | 0.96±0.06 | 69.03±0.10   |
| Gioia               | 64.27±0.13 | 7.67±0.11  | 8.24±0.11  | 2.21±0.10 | 82.48±0.37   |
| Guerriera           | 67.53±0.28 | 6.39±0.14  | 6.99±0.09  | 1.98±0.04 | 82.91±0.41   |
| Honey Kist          | 70.09±0.31 | 8.60±0.09  | 7.59±0.19  | 2.07±0.03 | 88.36±0.23   |
| Honey Royale        | 66.15±0.29 | 5.93±0.17  | 6.76±0.17  | 1.87±0.08 | 80.67±0.13   |
| Indipendence        | 58.41±0.22 | 4.21±0.17  | 8.27±0.07  | 1.23±0.09 | 72.11±0.15   |
| Lady Erika          | 69.72±0.28 | 5.94±0.10  | 8.66±0.10  | 1.05±0.07 | 85.37±0.61   |
| Lady Star           | 66.44±0.13 | 8.77±0.05  | 8.16±0.09  | 1.15±0.06 | 84.52±0.09   |
| Licinia             | 56.09±0.11 | 8.78±0.13  | 10.01±0.13 | 2.94±0.09 | 77.82±0.19   |
| Maeba Top           | 70.14±0.25 | 9.98±0.11  | 9.04±0.09  | 2.38±0.15 | 91.54±0.17   |
| Maria Aurelia       | 66.72±0.12 | 8.59±0.04  | 10.55±0.10 | 2.16±0.06 | 88.02±0.29   |
| Maria Camilla       | 68.28±0.32 | 7.91±0.10  | 10.04±0.09 | 1.65±0.09 | 87.89±0.24   |
| Maria Carla         | 69.95±0.36 | 7.72±0.12  | 9.86±0.13  | 2.24±0.07 | 89.78±0.56   |
| Maria Dolce         | 64.29±0.26 | 7.52±0.12  | 8.76±0.11  | 1.34±0.27 | 81.91±0.45   |
| Maria Dorata        | 61.70±0.14 | 5.31±0.28  | 6.13±0.08  | 0.98±0.04 | 74.12±0.10   |
| Maria Laura         | 64.98±0.19 | 4.56±0.10  | 6.09±0.12  | 1.08±0.10 | 76.70±0.17   |
| Max                 | 71.05±0.17 | 9.53±0.12  | 8.32±0.10  | 2.79±0.06 | 91.69±0.18   |
| Morsiani 51         | 68.05±0.21 | 8.89±0.11  | 7.31±0.14  | 1.12±0.04 | 85.45±0.22   |
| Morsiani 60         | 62.09±0.22 | 8.15±0.24  | 8.61±0.14  | 1.79±0.06 | 80.63±0.10   |
| Nectaross           | 82.27±0.15 | 10.13±0.06 | 8.66±0.06  | 2.01±0.06 | 103.07±0.20  |
| Orion               | 74.18±0.22 | 10.04±0.19 | 7.95±0.09  | 1.98±0.05 | 94.16±0.44   |
| Red Jewel           | 80.02±0.17 | 9.98±0.09  | 8.76±0.06  | 2.22±0.04 | 100.92±0.29  |
| Silvana             | 65.93±0.11 | 8.20±0.11  | 9.68±0.08  | 2.11±0.05 | 85.91±0.18   |
| Spring Bright       | 77.27±0.23 | 10.03±0.05 | 8.79±0.05  | 3.02±0.04 | 99.11±0.18   |
| Spring Red          | 63.90±0.26 | 6.92±0.23  | 8.16±0.05  | 2.19±0.05 | 81.18±0.17   |
| Star Bright         | 87.27±0.32 | 6.87±0.06  | 7.24±0.11  | 2.34±0.09 | 103.72±0.20  |
| Stark Redgold       | 74.37±0.15 | 7.43±0.06  | 8.57±0.04  | 2.11±0.04 | 92.45±0.13   |
| Summer Grand        | 76.29±0.21 | 9.78±0.08  | 10.86±0.13 | 1.34±0.04 | 98.27±0.34   |
| Superior Super Star | 61.06±0.25 | 7.07±0.08  | 8.47±0.10  | 1.75±0.11 | 78.35±0.58   |
| Sweet Lady          | 77.29±0.18 | 8.39±0.15  | 5.72±0.08  | 3.94±0.10 | 95.34±0.20   |
| Sweet Red           | 71.24±0.14 | 8.78±0.17  | 9.91±0.26  | 4.41±0.21 | 94.34±0.17   |
| Vega                | 70.69±0.16 | 6.28±0.05  | 7.27±0.08  | 3.34±0.12 | 88.12±0.72   |
| Venus               | 62.57±0.32 | 8.00±0.18  | 9.45±0.10  | 2.26±0.10 | 1145.29±0.23 |

|                        |            |            |            |           |            |
|------------------------|------------|------------|------------|-----------|------------|
| Weinberger             | 65.84±0.24 | 11.47±0.17 | 12.64±0.09 | 1.69±0.04 | 91.64±0.53 |
| <b>White-flesh cvs</b> |            |            |            |           |            |
| Caldesi 2000           | 66.48±0.1  | 11.37±0.3  | 6.20±0.07  | 1.39±0.07 | 84.71±0.19 |
| Caldesi 2010           | 58.94±0.08 | 10.50±0.2  | 7.09±0.1   | 3.32±0.1  | 76.73±0.21 |
| Caldesi 2020           | 57.94±0.2  | 10.19±0.05 | 7.39±0.2   | 3.24±0.08 | 75.23±0.27 |
| Maria Anna             | 58.52±0.1  | 11.23±0.1  | 6.87±0.04  | 1.12±0.04 | 77.93±0.19 |
| Maria Linda            | 55.35±0.1  | 10.95±0.09 | 5.61±0.08  | 3.29±0.05 | 70.56±0.26 |
| Silver Giant           | 60.37±0.03 | 9.45±0.1   | 5.93±0.07  | 2.26±0.08 | 75.68±0.82 |
| Silver Ray             | 68.31±0.1  | 9.02±0.09  | 6.90±0.1   | 2.29±0.04 | 83.85±0.39 |
| Silver Star            | 53.48±0.2  | 8.61±0.2   | 7.01±0.2   | 2.60±0.06 | 68.79±0.42 |

The data are presented as the mean ± S.D.
