# Supplementary material for: Evaluation of the Fruit Quality and Phytochemical Compounds in Peach and Nectarine Cultivars
Source: MDPI journal article supplement (doi:10.3390/plants12081618), 2023-04-12
Supplement: s1 [file s1]

**Table S2. Two-way ANOVA** for all variables analyzing two-levels factors:  
**Type:** Peach or Nectarine **Color:** Yellow or White

| <b>°Brix (%)</b> (Significant F at 5% level are marked in red) |                |    |             |          |       |
|----------------------------------------------------------------|----------------|----|-------------|----------|-------|
| Cases                                                          | Sum of Squares | df | Mean Square | F        | p     |
| Color                                                          | 0.593          | 1  | 0.593       | 0.287    | 0.594 |
| Type                                                           | 2.377          | 1  | 2.377       | 1.149    | 0.287 |
| Color * Type                                                   | 0.356          | 1  | 0.356       | 0.172    | 0.680 |
| Residuals                                                      | 165.6          | 80 | 2.096       | <b>a</b> |       |

| <b>Total Acidity</b> (g malic acid L <sup>-1</sup> )(Significant F at 5% level are marked in red) |                |    |             |          |       |
|---------------------------------------------------------------------------------------------------|----------------|----|-------------|----------|-------|
| Cases                                                                                             | Sum of Squares | df | Mean Square | F        | p     |
| Color                                                                                             | 0.753          | 1  | 0.753       | 0.140    | 0.710 |
| Type                                                                                              | 25.22          | 1  | 25.22       | 4.676    | 0.034 |
| Color * Type                                                                                      | 5.818          | 1  | 5.818       | 1.079    | 0.302 |
| Residuals                                                                                         | 432.0          | 80 | 5.394       | <b>b</b> |       |

| <b>pH</b> (Significant F at 5% level are marked in red) |                |    |             |          |       |
|---------------------------------------------------------|----------------|----|-------------|----------|-------|
| Cases                                                   | Sum of Squares | df | Mean Square | F        | p     |
| Color                                                   | 0.182          | 1  | 0.182       | 1.772    | 0.187 |
| Type                                                    | 0.008          | 1  | 0.008       | 0.079    | 0.780 |
| Color * Type                                            | 0.140          | 1  | 0.140       | 1.368    | 0.246 |
| Residuals                                               | 8.211          | 80 | 0.103       | <b>c</b> |       |

| <b>RI index</b> (Significant F at 5% level are marked in red) |                |    |             |          |       |
|---------------------------------------------------------------|----------------|----|-------------|----------|-------|
| Cases                                                         | Sum of Squares | df | Mean Square | F        | p     |
| Color                                                         | 0.040          | 1  | 0.040       | 0.324    | 0.571 |
| Type                                                          | 0.135          | 1  | 0.135       | 1.094    | 0.299 |
| Color * Type                                                  | 0.047          | 1  | 0.047       | 0.379    | 0.540 |
| Residuals                                                     | 9.868          | 80 | 0.123       | <b>d</b> |       |

| L (Significant F at 5% level are marked in red) |                |    |             |        |         |
|-------------------------------------------------|----------------|----|-------------|--------|---------|
| Cases                                           | Sum of Squares | df | Mean Square | F      | p       |
| Color                                           | 731.4          | 1  | 731.4       | 6.690  | 0.012   |
| Type                                            | 2168           | 1  | 2168        | 19.827 | < 0.001 |
| Color * Type                                    | 1757           | 1  | 1757        | 16.076 | < 0.001 |
| Residuals                                       | 8746           | 80 | 109.3       | e      |         |

| Polyphenols (mg GAE g <sup>-1</sup> ) (Significant F at 5% level are marked in red) |                |    |             |       |       |
|-------------------------------------------------------------------------------------|----------------|----|-------------|-------|-------|
| Cases                                                                               | Sum of Squares | df | Mean Square | F     | p     |
| Color                                                                               | 0.002          | 1  | 0.002       | 0.020 | 0.888 |
| Type                                                                                | 0.065          | 1  | 0.065       | 0.562 | 0.456 |
| Color * Type                                                                        | 0.106          | 1  | 0.106       | 0.915 | 0.342 |
| Residuals                                                                           | 9.226          | 80 | 0.115       | f     |       |

| DPPH (Significant F at 5% level are marked in red) |                |    |             |       |       |
|----------------------------------------------------|----------------|----|-------------|-------|-------|
| Cases                                              | Sum of Squares | df | Mean Square | F     | p     |
| Color                                              | 186.3          | 1  | 186.3       | 0.276 | 0.601 |
| Type                                               | 365.5          | 1  | 365.5       | 0.542 | 0.464 |
| Color * Type                                       | 1.017          | 1  | 1.017       | 0.002 | 0.969 |
| Residuals                                          | 5.395e+4       | 80 | 674.4       | g     |       |

| Chlorogenic acid (Significant F at 5% level are marked in red) |                |    |             |       |       |
|----------------------------------------------------------------|----------------|----|-------------|-------|-------|
| Cases                                                          | Sum of Squares | df | Mean Square | F     | p     |
| Color                                                          | 1795           | 1  | 1795        | 1.251 | 0.267 |
| Type                                                           | 7294           | 1  | 7294        | 5.085 | 0.027 |
| Color * Type                                                   | 3899           | 1  | 3899        | 2.718 | 0.103 |
| Residuals                                                      | 1.148e+5       | 80 | 1435        | h     |       |

| Neochlorogenic acid (Significant F at 5% level are marked in red) |                |    |             |       |       |
|-------------------------------------------------------------------|----------------|----|-------------|-------|-------|
| Cases                                                             | Sum of Squares | df | Mean Square | F     | p     |
| Color                                                             | 405.3          | 1  | 405.3       | 0.741 | 0.392 |
| Type                                                              | 3519           | 1  | 3519        | 6.437 | 0.013 |
| Color * Type                                                      | 737.1          | 1  | 737.1       | 1.348 | 0.249 |
| Residuals                                                         | 4.734e+4       | 80 | 546.7       | i     |       |

| Catechin (Significant F at 5% level are marked in red) |                |    |             |       |       |
|--------------------------------------------------------|----------------|----|-------------|-------|-------|
| Cases                                                  | Sum of Squares | df | Mean Square | F     | p     |
| Color                                                  | 2820           | 1  | 2820        | 1.614 | 0.208 |
| Type                                                   | 21.13          | 1  | 21.13       | 0.012 | 0.913 |
| Color * Type                                           | 1045           | 1  | 1045        | 0.598 | 0.442 |
| Residuals                                              | 13.98e+5       | 80 | 1747        | 1     |       |

| Epicatechin (Significant F at 5% level are marked in red) |                |    |             |       |       |
|-----------------------------------------------------------|----------------|----|-------------|-------|-------|
| Cases                                                     | Sum of Squares | df | Mean Square | F     | p     |
| Color                                                     | 169.8          | 1  | 169.8       | 1.259 | 0.265 |
| Type                                                      | 139.0          | 1  | 139.0       | 1.031 | 0.313 |
| Color * Type                                              | 107.4          | 1  | 107.4       | 0.797 | 0.375 |
| Residuals                                                 | 1.079e+4       | 80 | 134.9       | m     |       |
