# Supplementary material for: Evaluation of the Fruit Quality and Phytochemical Compounds in Peach and Nectarine Cultivars
Source: MDPI journal article supplement (doi:10.3390/plants12081618), 2023-04-12
Supplement: s1 [file s1]

**Table S3.** Sugar content (g kg<sup>-1</sup> FW) in fruits of yellow and white peach cultivars.

| <b>Yellow-flesh cvs</b> | <b>Sucrose</b> | <b>Glucose</b> | <b>Fructose</b> | <b>Sorbitol</b> | <b>Total sugars</b> |
|-------------------------|----------------|----------------|-----------------|-----------------|---------------------|
| Elegant Lady            | 58.79±1.3      | 6.96±0.2       | 9.79±0.6        | 2.23±0.09       | 77.77±1.07          |
| Fayette                 | 74.12±0.7      | 12.14±0.4      | 10.08±0.1       | 1.82±0.06       | 98.16±0.42          |
| Flavorcrest             | 73.37±1.0      | 9.15±0.6       | 9.97±0.2        | 1.82±0.05       | 94.30±1.02          |
| Glohaven                | 60.05±0.6      | 4.57±0.3       | 6.20±0.2        | 1.56±0.09       | 72.38±0.64          |
| Grenat                  | 81.99±0.9      | 10.05±0.2      | 7.48±0.4        | 1.77±0.05       | 101.30±1.35         |
| Guglielmina             | 48.96±0.5      | 4.14±0.1       | 5.47±0.2        | 1.52±0.2        | 60.11±0.62          |
| Kaweah                  | 53.65±0.4      | 6.11±0.2       | 8.06±0.2        | 1.80±0.3        | 69.62±0.67          |
| Lara Star               | 76.06±0.5      | 10.95±0.05     | 9.02±0.09       | 1.83±0.09       | 97.86±0.33          |
| Lizbeth                 | 80.23±0.8      | 6.11±0.2       | 9.91±0.2        | 2.01±0.2        | 99.66±0.79          |
| Maria Marta             | 70.03±0.3      | 11.3±0.07      | 7.64±0.3        | 2.16±0.04       | 91.17±0.66          |
| Maria Silvia            | 68.31±0.8      | 10.40±0.4      | 10.32±0.4       | 1.78±0.3        | 90.81±1.60          |
| Padana                  | 66.91±0.4      | 7.01±0.1       | 9.04±0.06       | 1.68±0.04       | 84.64±0.55          |
| Red Coast               | 58.31±0.4      | 7.41±0.09      | 6.44±0.2        | 1.13±0.07       | 73.30±0.10          |
| Redhaven                | 54.71±0.5      | 6.15±0.1       | 7.59±0.2        | 1.96±0.09       | 70.41±0.28          |
| Red Valley              | 59.92±0.4      | 6.22±0.1       | 8.33±0.1        | 1.46±0.08       | 75.93±0.28          |
| Rich Lady               | 66.21±0.5      | 5.21±0.1       | 6.60±0.2        | 1.22±0.04       | 79.23±0.33          |
| Rome Star               | 63.90±1.1      | 10.94±0.07     | 11.53±0.2       | 2.32±0.4        | 88.47±1.44          |
| Summer Rich             | 50.21±0.4      | 10.76±0.08     | 9.91±0.4        | 1.39±0.06       | 72.27±0.76          |
| Suncrest                | 58.26±0.3      | 5.54±0.2       | 9.85±0.3        | 2.19±0.1        | 75.84±0.61          |
| Symphonie               | 75.89±0.3      | 12.49±0.1      | 12.56±0.1       | 1.67±0.07       | 102.61±0.44         |
| Vistarich               | 51.65±0.5      | 6.93±0.2       | 8.47±0.2        | 1.04±0.05       | 68.08±0.18          |
| Zee Lady                | 62.51±0.4      | 7.69±0.1       | 8.83±0.06       | 1.24±0.07       | 81.41±0.11          |
| Babygold 7              | 64.33±0.1      | 6.73±0.07      | 4.92±0.08       | 1.16±0.06       | 77.14±0.38          |
| Babygold 9              | 69.32±0.2      | 7.44±0.2       | 5.64±0.09       | 1.35±0.07       | 83.73±0.28          |
| Carson                  | 63.83±0.2      | 5.57±0.09      | 4.95±0.07       | 1.10±0.04       | 75.32±0.40          |
| Cotogna del Poggio      | 66.14±0.1      | 5.99±0.1       | 5.73±0.10       | 1.09±0.03       | 78.96±0.19          |
| <b>White-flesh cvs</b>  |                |                |                 |                 |                     |
| Greta                   | 68.72±0.2      | 11.14±0.1      | 8.69±0.2        | 1.03±0.05       | 89.59±0.60          |
| Maria Bianca            | 69.72±0.8      | 12.09±0.1      | 11.3±0.2        | 0.70±0.04       | 93.86±0.47          |
| Maria Regina            | 63.83±0.2      | 10.30±0.1      | 9.96±0.1        | 0.92±0.05       | 85.02±0.40          |
| Michellini              | 76.08±0.1      | 11.48±0.2      | 10.2±0.3        | 1.01±0.04       | 89.99±0.41          |
| Rosa del West           | 71.12±0.3      | 9.51±0.2       | 8.34±0.1        | 1.05±0.08       | 89.99±0.39          |
| Tardivo Zuliani         | 61.05±0.2      | 7.29±0.1       | 8.59±0.1        | 1.02±0.04       | 77.96±0.50          |

The data are presented as the mean ± S.D.
