# Supplementary material for: Evaluation of the Fruit Quality and Phytochemical Compounds in Peach and Nectarine Cultivars
Source: MDPI journal article supplement (doi:10.3390/plants12081618), 2023-04-12
Supplement: s1 [file s1]

**Table S6.** Concentration (mg/Kg FW) of phenolic compound in yellow-and white-flesh peaches (nd: not determined)

[illegible]

|                 |       |       |        |       |        |        |
|-----------------|-------|-------|--------|-------|--------|--------|
| Greta           | 46.67 | 63.64 | 77.34  | 21.53 | 98.87  | 110.30 |
| Maria Bianca    | 11.48 | 20.89 | nd     | nd    | -      | 32.38  |
| Maria Regina    | 11.01 | 16.45 | nd     | 34.88 | 34.88  | 27.46  |
| Michelini       | 44.41 | 31.28 | 92.10  | 15.42 | 107.52 | 75.70  |
| Rosa del West   | 21.30 | 53.53 | 117.24 | 23.09 | 140.33 | 74.83  |
| Tardivo Zuliani | 7.02  | 11.29 | nd     | 18.83 | 18.83  | 18.31  |
