# Supplementary material for: Evaluation of the Fruit Quality and Phytochemical Compounds in Peach and Nectarine Cultivars
Source: MDPI journal article supplement (doi:10.3390/plants12081618), 2023-04-12
Supplement: s1 [file s1]

**Table S5.** Concentration (mg/Kg FW) of phenolic compound in yellow-and white-flesh nectarines (nd: not determined)

|                         | Neochlorogenic<br>acid | Chlorogenic<br>acid | Cathechin | Epicatechin | Total<br>Flavan-3-ols | Total<br>HYdroxycinnamic<br>acids |
|-------------------------|------------------------|---------------------|-----------|-------------|-----------------------|-----------------------------------|
| <b>Yellow-flesh cvs</b> |                        |                     |           |             |                       |                                   |
| Alitop                  | 10.60                  | 12.97               | nd        | 3.92        | 3.92                  | 23.57                             |
| Alma                    | 68.72                  | 121.02              | 69.67     | 22.52       | 92.19                 | 189.74                            |
| Amiga                   | 38.99                  | 52.12               | nd        | nd          | -                     | 91.10                             |
| Antares                 | 26.53                  | 65.82               | 122.21    | nd          | 122.21                | 92.35                             |
| August Red              | 24.51                  | 54.66               | 61.25     | 18.79       | 80.04                 | 79.17                             |
| Big Top                 | 20.96                  | 22.88               | nd        | 22.52       | 22.52                 | 43.85                             |
| Claudia                 | 18.20                  | 17.80               | nd        | 30.33       | 30.33                 | 36.00                             |
| Diamond Princess        | 21.49                  |                     | 26.78     | nd          | 26.78                 | 59.54                             |
| Diamond Ray             | 69.85                  | 77.29               | 27.63     | 3.66        | 31.29                 | 147.14                            |
| Fire Top                | 15.11                  | 25.55               | 11.16     | 28.34       | 39.51                 | 40.66                             |
| G. Laura Dolce          | 28.38                  | 38.68               | 31.75     | 38.01       | 67.06                 | 67.06                             |
| Gioia                   | 6.20                   | 10.28               | nd        | 26.21       | 26.21                 | 16.49                             |
| Guerriera               | 9.33                   |                     | nd        | 5.20        | 5.20                  | 9.33                              |
| Honey Kist              | 8.24                   | 4.16                | nd        | 42.40       | 42.40                 | 12.41                             |
| Honey Royale            | 47.27                  | 46.55               | nd        | 21.53       | 21.53                 | 93.82                             |
| Indipendence            | 20.99                  | 37.09               | nd        | 25.79       | 25.79                 | 58.08                             |
| Lady Erika              | 61.43                  | 61.69               | 59.58     | 27.49       | 87.08                 | 123.10                            |
| Lady Star               | 46.96                  | 40.84               | 132.57    | 12.58       | 145.15                | 87.79                             |
| Licina                  | 19.57                  | 29.92               | 15.85     | 33.88       | 49.73                 | 49.49                             |
| Maeba Top               | 9.83                   | 7.81                | nd        | 20.39       | 20.39                 | 17.64                             |
| Maria Aurelia           | 16.40                  | 15.52               | nd        | 11.87       | 11.87                 | 31.92                             |
| Maria Camilla           | 21.47                  | 12.23               | nd        | 27.35       | 27.35                 | 33.70                             |
| Maria Carla             | 32.39                  | 60.61               | 30.47     | 25.08       | 55.55                 | 93.00                             |
| Maria Dolce             | 66.16                  | 19.31               | 86.99     | 35.73       | 122.72                | 85.46                             |
| Maria Dorata            | 49.22                  | 73.07               | 15.42     | 26.64       | 42.06                 | 117.58                            |
| Maria Laura             | 31.28                  | 39.16               |           | 16.84       | 16.84                 | 70.44                             |

|                        |        |        |          |       |        |        |
|------------------------|--------|--------|----------|-------|--------|--------|
| Max                    | 128.27 | 125.27 | 77.62    | 19.68 | 97.30  | 253.54 |
| Morsiani 51            | 72.01  | 158.63 | 72.51    | 33.88 | 106.39 | 230.64 |
| Morsiani 60            | 25.40  | 40.36  | 50.78    | nd    | 50.78  | 65.76  |
| Nectaross              | 49.16  | 84.61  | 68.81    | 23.80 | 92.61  | 133.78 |
| Orion                  | 58.21  | 87.04  | 125.47   | 22.24 | 147.71 | 145.25 |
| Red Jewel              | 41.48  | 50.77  | nd       | nd    | -      | 92.26  |
| Silvana                | 5.82   | 4.88   | nd       | nd    | -      | 10.70  |
| Spring Bright          | 20.31  | 8.29   | nd       | 16.13 | 16.13  | 28.61  |
| Spring Red             | 37.62  | 23.70  | nd       | nd    | nd     | 61.32  |
| Star Bright            | 20.32  | 94.33  | 28.63    | nd    | 28.63  | 139.68 |
| Stark Redgold          | 55.72  | 113.34 | 117.80   | 18.55 | 136.35 | 169.06 |
| Summer Grand           | 33.97  | 37.31  | 25.50    | 24.51 | 50.01  | 71.28  |
| Sup Super Star         | 32.05  | 25.57  | 83.72    | 20.81 | 104.54 | 57.62  |
| Sweet Lady             | 66.42  | 52.96  | 41.55    | 23.23 | 64.78  | 119.38 |
| Sweet Red              | 12.16  | 17.56  | 10.88    | 23.80 | 34.68  | 29.71  |
| Vega                   | 47.03  | 47.94  | 21.373.9 | 35.73 | 57.11  | 94.97  |
| Venus                  | 27.56  | 34.84  | nd       | 23.66 | 76.00  | 62.40  |
| Weinberger             | 8.77   | 15.32  | nd       | 37.29 | 37.29  | 24.02  |
| <b>White flesh cvs</b> |        |        |          |       |        |        |
| Caldesi 2000           | 31.38  | 50.51  | nd       | 15.56 | 15.56  | 81.89  |
| Caldesi 2010           | 22.24  | 39.01  | 20.96    | 12.30 | 33.26  | 61.25  |
| Caldesi 2020           | 25.62  | 42.66  | 16.55    | 14.78 | 31.33  | 68.28  |
| Maria Anna             | 50.29  | 50.75  | 113.83   | 20.39 | 134.22 | 101.04 |
| Maria Linda            | 48.31  | 45.62  | 88.75    | 17.41 | 106.16 | 93.93  |
| Silver Giant           | 78.23  | 162.06 | 61.15    | 21.24 | 82.39  | 240.29 |
| Silver Ray             | 30.50  | 38.80  | 68.96    | 34.02 | 102.98 | 69.29  |
| Silver Star            | 108.08 | 184.67 | 99.77    | 12.58 | 193.09 | 292.75 |
